# Supplementary material
Source: PubMed Central journal article supplement (PMC3432586)

**Enhancement of 26S Proteasome Functionality Connects Oxidative Stress and Vascular  
Endothelial Inflammatory Response in Diabetes**

Liu: Proteasome connects oxidative stress and inflammation

Hongtao Liu<sup>1</sup>, Shujie Yu<sup>1</sup>, Wenjia Xu<sup>2</sup>, Jian Xu<sup>1‡</sup>

<sup>1</sup>Endocrinology and Diabetes, Department of Medicine, Harold Hamm Diabetes Center,  
University of Oklahoma Health Sciences Center, Oklahoma City, OK 73104, USA. <sup>2</sup>Duke  
University, Durham, NC 27708, USA

‡ Address correspondence to

Jian Xu, PhD

Section of Endocrinology and Diabetes

Department of Medicine

University of Oklahoma Health Sciences Center

Harold Hamm Oklahoma Diabetes Center

Oklahoma City, OK 73104.

Phone: (405)271-8001 ext 48495

Fax: (405)271-3973

e-mail: jian-xu@ouhsc.edu

## Legends of Supplemental Figures

**Supplemental Figure I. Ub<sup>G76V</sup>-GFP mice can be rendered diabetic by low dose regime of STZ, like their genetic control C57BL/6J mice.** Male and age matched (10 wks) wild type (C57BL/6J) and transgenic (Ub<sup>G76V</sup>-GFP) mice received STZ-regimen (STZ: 50mg/kg/d; vehicle: sodium citrate, pH 4.5; for 5d; n=5/group). (A) Fasting (4h) blood glucose and (B) body weight shown here were obtained on 7<sup>th</sup> day after the STZ regimen. The results (n=5/group) were analyzed with a one-way ANOVA. \**P*< 0.05.

**Supplemental Figure II. Acute diabetes does not affect the protein levels of the PA700 (S10B), the regulatory sub-complex and activator of the 26S proteasome, in Ub<sup>G76V</sup>-GFP mice.** Male and age matched (10 wks) wild type (C57BL/6J) and transgenic (Ub<sup>G76V</sup>-GFP) mice received STZ-regimen (STZ: 50mg/kg/d; vehicle: sodium citrate, pH 4.5; for 5d; n=5/group). Tissue preparations 7d post STZ regimen were subjected to (A) Western blotting with a rabbit derived PA700 (S10B) antibody and a mouse derived  $\beta$ -actin antibody, followed by (B) quantification of protein band densitometry for levels of PA700 (S10B). The results (n=5/group) were analyzed with a one-way ANOVA. \**P*< 0.05 vs the vehicle-treated.

**Supplemental Figure III. The proposed scheme of early enhancement of 26S proteasome functionality and NF- $\kappa$ B-mediated inflammatory response in diabetes:** this study employed cell and mouse models to demonstrate that: (1) diabetes enhances 26S proteasome functionality in aortic, renal and retinal tissues; (2) such enhancement involves reactive oxidative species-

mediated 26S proteasome activation; (3) the enhancement operates as an early event in diabetes without affecting markers of autophagy and unfolded protein response (UPR); and (4) such an early event leads to activation of NF- $\kappa$ B pathway and pro-inflammatory responses. To the best of our knowledge, this is the first study on diabetic 26S proteasome functionality *in vivo* which is altered by acute hyperglycemia and may be the trigger of the increased inflammation observed in patients of diabetes. Notes, the models referred to cells (Ub<sup>G76V</sup>-GFP cell/GFPu-1/HEK293, HUVEC, and BAEC/not shown) and mice (STZ-diabetic Ub<sup>G76V</sup>-GFP mice and C57BL/6J mice, genetic diabetic OVE26 and Akita mice), the interventions included pharmaceutical and genetic approaches to inhibit or scavenge the generation of superoxide (mTEMPO), nitric oxide (L-NAME), or peroxynitrite (Uric acid); or to inhibit either 26S proteasome activity (MG132) or 26S proteasome activation (siRNA knockdown of 19S/PA700, the 26S proteasome activator). The checkpoints covered protein levels and cellular locations of poly-Ub-GFP and/or NF- $\kappa$ B and I $\kappa$ B $\alpha$ , promoter binding capacity of NF- $\kappa$ B (ChIP assay for promoters of Ccl5/RANTES, ICAM-1 and I $\kappa$ B $\alpha$ ), as well as 26S proteasome activity and markers of autophagy and unfolded protein response (UPR).

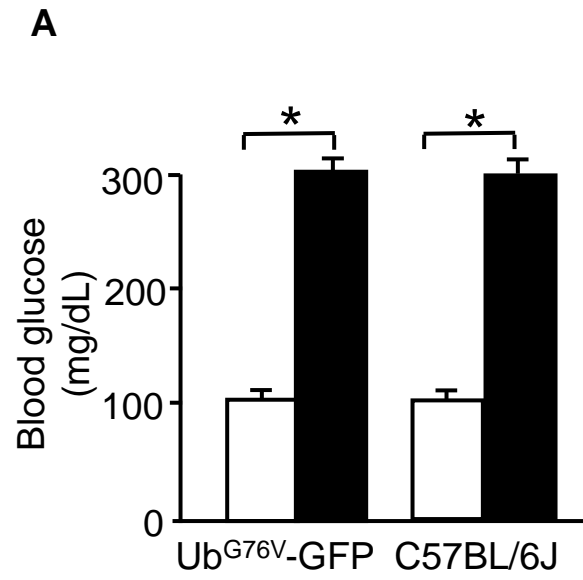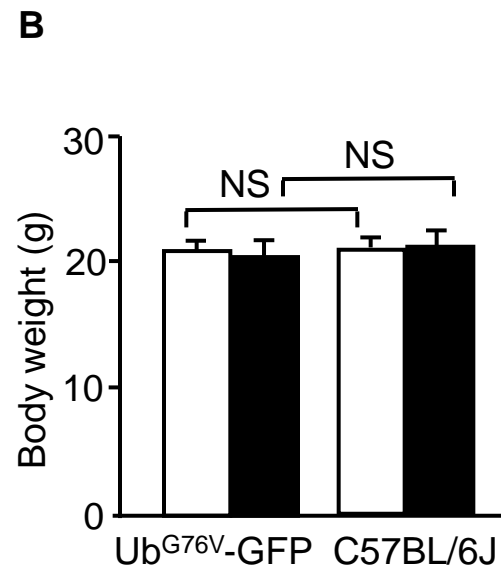

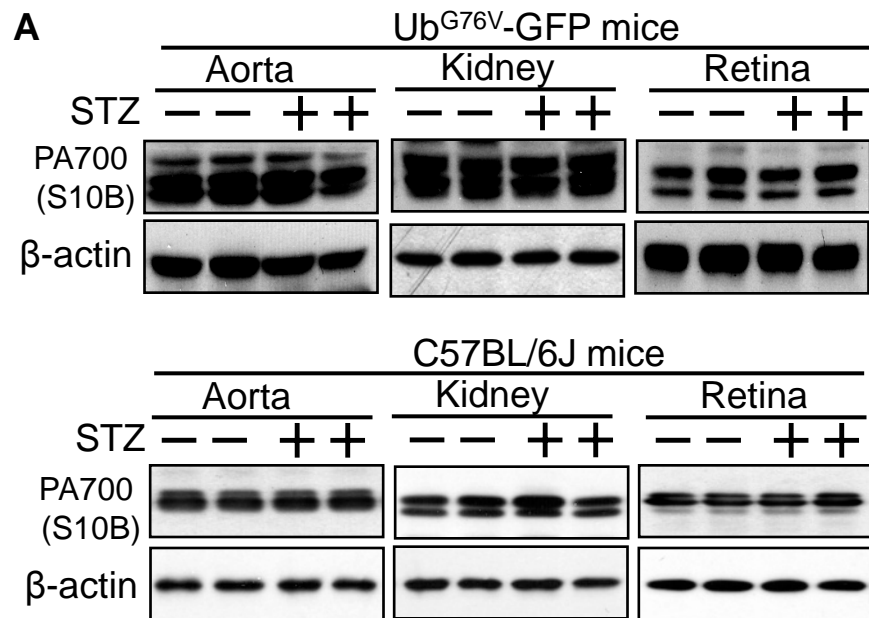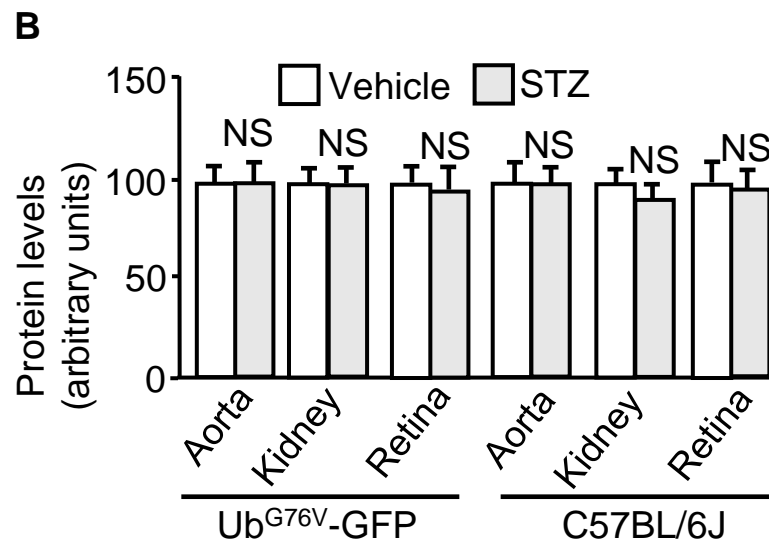

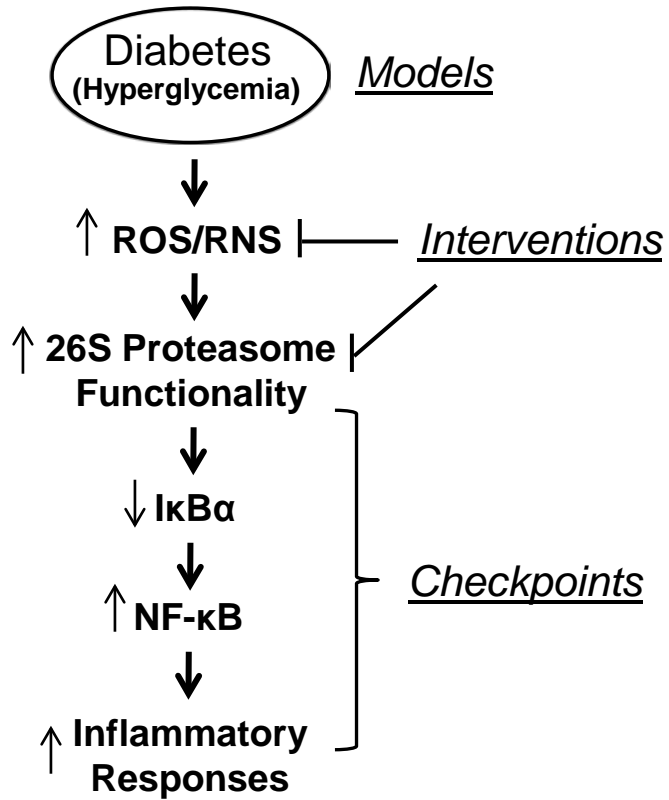

Supplement: NIHMS397079-supplement-1.pdf [file NIHMS397079-supplement-1.pdf]
